# Supplementary material for: The potential health effects of dietary phytoestrogens
Source: PubMed Central journal article supplement — Br J Pharmacol. 2016 Oct 20;174(11):1263–80. doi: 10.1111/bph.13622 (PMC5429336; doi:10.1111/bph.13622), 2016-10-20
Supplement: BPH-174-1263-s001.pdf [file BPH-174-1263-s001.pdf]

Supplementary table 1: binding affinity of E2 and phytoestrogens to ER $\alpha$  and ER $\beta$  (expressed as IC50 values from competitive binding assays).

| chemical      | IC50 E2 (nM) |        | IC50 phytoestrogen (nM) |        | reference                       |
|---------------|--------------|--------|-------------------------|--------|---------------------------------|
|               | ERalpha      | ERbeta | ERalpha                 | ERbeta |                                 |
| bavachin      | 1.4          | 1.4    | 65700                   | 38000  | Park <i>et al.</i> , 2012       |
| B-erythroidin | 8.3          | 5.5    | 111000                  | 96100  | Djiogue <i>et al.</i> , 2014    |
| B-sitosterol  | 3.5          | 65     | 4000                    | 4000   | Gutendorf and Westendorf, 2     |
| coumestrol    | 0.93         | 1.06   | 2.7                     | 1.1    | Kuiper <i>et al.</i> , 1998     |
| coumestrol    | 3.5          | 65     | 3000                    | 3000   | Gutendorf and Westendorf, 2     |
| daidzein      | 0.2          | 0.5    | 2000                    | 1300   | De Angelis <i>et al.</i> , 2005 |
| daidzein      | 0.93         | 1.06   | 420                     | 100    | Kuiper <i>et al.</i> , 1998     |
| dehydroequol  | 0.2          | 0.5    | 430                     | 12     | De Angelis <i>et al.</i> , 2005 |
| equol         | 0.2          | 0.5    | 100                     | 29     | De Angelis <i>et al.</i> , 2005 |
| ferutinine    | 3.2          | 14.6   | 33.1                    | 180.5  | Ikeda <i>et al.</i> , 2002      |
| genistein     | 0.2          | 0.5    | 29                      | 3.8    | De Angelis <i>et al.</i> , 2005 |
| genistein     | 0.93         | 1.06   | 145                     | 8.4    | Kuiper <i>et al.</i> , 1998     |
| genistein     | 3.5          | 65     | 35000                   | 2000   | Gutendorf and Westendorf, 2     |
| kievitone     | 0.7          | 0.72   | 145                     | 173    | Boue <i>et al.</i> , 2011       |
| phaseollin    | 0.7          | 0.72   | 328                     | 134    | Boue <i>et al.</i> , 2011       |
| psoralidin    | 5.76         | 7.06   | 1003                    | 24600  | Liu <i>et al.</i> , 2014        |
| tschimgine    | 3.2          | 14.6   | 5500                    | 17100  | Ikeda <i>et al.</i> , 2002      |

Supplementary table 2: ER $\alpha$ - and ER $\beta$ - mediated gene expression induced by E2 and phytoestrogens (expressed as EC50 values from reporter gene assays).

| chemical     | EC50 E2 (nM) |        | EC50 phytoestrogen (nM) |        | reference                        |
|--------------|--------------|--------|-------------------------|--------|----------------------------------|
|              | ERalpha      | ERbeta | ERalpha                 | ERbeta |                                  |
| apigenin     | 0.0025       | 0.0053 | 740                     | 100    | Takeuchi <i>et al.</i> , 2009    |
| biochanin A  | 0.41         | 0.16   | 950                     | 180    | Dornstauder <i>et al.</i> , 2001 |
| biochanin A  | 0.0025       | 0.0053 | 210                     | 26     | Takeuchi <i>et al.</i> , 2009    |
| biochanin A  | 0.017        | 0.068  | 82                      | 6.8    | Escande <i>et al.</i> , 2006     |
| chrysin      | 0.0025       | 0.0053 | 5300                    | 3000   | Takeuchi <i>et al.</i> , 2009    |
| coumestrol   | 0.0025       | 0.0053 | 0.45                    | 0.24   | Takeuchi <i>et al.</i> , 2009    |
| coumestrol   | 0.017        | 0.068  | 16                      | 6.9    | Escande <i>et al.</i> , 2006     |
| coumestrol   | 0.064        | 0.039  | 1600                    | 16     | Harris <i>et al.</i> , 2005      |
| daidzein     | 0.41         | 0.16   | 10000                   | 960    | Dornstauder <i>et al.</i> , 2001 |
| daidzein     | 0.017        | 0.068  | 150                     | 57     | Escande <i>et al.</i> , 2006     |
| daidzein     | 0.021        | 0.11   | 250                     | 100    | De Angelis <i>et al.</i> , 2005  |
| daidzein     | 0.11         | 0.05   | 631                     | 16     | Chrzan and Bradford, 2007        |
| daidzein     | 0.32         | 1.5    | 390                     | 87     | Casanova <i>et al.</i> , 1999    |
| daidzein     | 0.0025       | 0.0053 | 24                      | 2.1    | Takeuchi <i>et al.</i> , 2009    |
| daidzein     | 0.0026       | 0.041  | 76                      | 14     | Islam <i>et al.</i> , 2015       |
| daidzein     | 0.531        | 0.585  | 545                     | 145    | Chu <i>et al.</i> , 2009         |
| daidzein     | 0.45         | 0.03   | 15500                   | 13     | Chrzan and Bradford, 2007        |
| dehydroequol | 0.021        | 0.11   | 3200                    | 7.2    | De Angelis <i>et al.</i> , 2005  |
| emodin       | 0.531        | 0.585  | 89.5                    | 14.4   | Chu <i>et al.</i> , 2009         |
| enterodiol   | 0.0025       | 0.0053 | 7200                    | 3500   | Takeuchi <i>et al.</i> , 2009    |
| enterolacton | 0.0025       | 0.0053 | 1200                    | 450    | Takeuchi <i>et al.</i> , 2009    |
| equol        | 0.0025       | 0.0053 | 4.6                     | 1.3    | Takeuchi <i>et al.</i> , 2009    |
| equol        | 0.021        | 0.11   | 200                     | 74     | De Angelis <i>et al.</i> , 2005  |
| ferutinin    | 0.017        | 0.068  | 0.64                    | 3.9    | Tiosano <i>et al.</i> , 2014     |
| formononetin | 0.41         | 0.16   | 2000                    | 1500   | Dornstauder <i>et al.</i> , 2001 |
| formononetin | 0.0025       | 0.0053 | 260                     | 300    | Takeuchi <i>et al.</i> , 2009    |
| genistein    | 0.4          | 0.2    | 5.7                     | 2.2    | Rickard <i>et al.</i> (2003)     |
| genistein    | 0.017        | 0.068  | 18.8                    | 6.1    | Tiosano <i>et al.</i> , 2014     |
| genistein    | 0.11         | 0.05   | 333                     | 13     | Chrzan and Bradford, 2007        |
| genistein    | 0.021        | 0.11   | 20                      | 6      | De Angelis <i>et al.</i> , 2005  |
| genistein    | 0.45         | 0.03   | 655                     | 1.7    | Chrzan and Bradford, 2007        |
| genistein    | 0.017        | 0.068  | 38                      | 5.8    | Escande <i>et al.</i> , 2006     |
| genistein    | 0.32         | 1.5    | 34                      | 4.9    | Casanova <i>et al.</i> , 1999    |
| genistein    | 0.531        | 0.585  | 356                     | 11.3   | Chu <i>et al.</i> , 2009         |
| genistein    | 0.0025       | 0.0053 | 2.3                     | 0.1    | Takeuchi <i>et al.</i> , 2009    |
| genistein    | 0.41         | 0.16   | 900                     | 4.2    | Dornstauder <i>et al.</i> , 2001 |
| genistein    | 0.0026       | 0.041  | 16.2                    | 1.9    | Islam <i>et al.</i> , 2015       |
| genistein    | 0.064        | 0.039  | 460                     | 3.4    | Harris <i>et al.</i> , 2005      |
| glycitein    | 0.0025       | 0.0053 | 590                     | 64     | Takeuchi <i>et al.</i> , 2009    |
| hesperetin   | 0.0025       | 0.0053 | 1300                    | 780    | Takeuchi <i>et al.</i> , 2009    |
| kaempferol   | 0.0025       | 0.0053 | 3500                    | 580    | Takeuchi <i>et al.</i> , 2009    |
| luteolin     | 0.0025       | 0.0053 | 1700                    | 590    | Takeuchi <i>et al.</i> , 2009    |
| naringenin   | 0.0025       | 0.0053 | 990                     | 120    | Takeuchi <i>et al.</i> , 2009    |
| o-DMA        | 0.0025       | 0.0053 | 24                      | 18     | Takeuchi <i>et al.</i> , 2009    |
| phloretin    | 0.0025       | 0.0053 | 310                     | 220    | Takeuchi <i>et al.</i> , 2009    |
| 3',4',7-THF  | 0.0025       | 0.0053 | 880                     | 320    | Takeuchi <i>et al.</i> , 2009    |
